# Supplementary material for: Lactiplantibacillus plantarum ST-III-fermented milk improves autistic-like behaviors in valproic acid-induced autism spectrum disorder mice by altering gut microbiota
Source: Front Nutr. 2022 Nov 24;9:1005308. doi: 10.3389/fnut.2022.1005308 (PMC9729765; doi:10.3389/fnut.2022.1005308)
Supplement: Supplementary file 2 [file Table_2.XLSX]

## Sheet: Sheet1
Table S2. Correlation between metabolic pathways and significantly changed genus
Pathway ID	Pathway	Secondary superclass	Functional category	Genus	Correlation coefficient	p value
PWY-3661	glycine betaine degradation I	Amine and Polyamine Degradation	Degradation/Utilization/Assimilation	Lactiplantibacillus	0.736301	6.86e-05
P4-PWY	superpathway of L-lysine, L-threonine and L-methionine biosynthesis I	Amino Acid Biosynthesis	Biosynthesis	Desulfovibrio	0.689998	9.93e-05
PWY-181	photorespiration	Amino Acid Biosynthesis	Biosynthesis	Desulfovibrio	0.778758	0.00546732
PWY-5505	L-glutamate and L-glutamine biosynthesis	Amino Acid Biosynthesis	Biosynthesis	Kineothrix	0.712135	2.19e-07
PWY-5028	L-histidine degradation II	Amino Acid Degradation	Degradation/Utilization/Assimilation	Adlercreutzia	0.759922	3.01e-05
PWY-5028	L-histidine degradation II	Amino Acid Degradation	Degradation/Utilization/Assimilation	Burkholderia	0.935646	1.67e-33
P162-PWY	L-glutamate degradation V (via hydroxyglutarate)	Amino Acid Degradation	Degradation/Utilization/Assimilation	Desulfovibrio	0.720304	1.87e-05
PWY-5028	L-histidine degradation II	Amino Acid Degradation	Degradation/Utilization/Assimilation	Gemella	0.847401	4.71e-07
CATECHOL-ORTHO-CLEAVAGE-PWY	catechol degradation to beta-ketoadipate	Aromatic Compound Degradation	Degradation/Utilization/Assimilation	Adlercreutzia	0.751564	0.000106142
PROTOCATECHUATE-ORTHO-CLEAVAGE-PWY	protocatechuate degradation II (ortho-cleavage pathway)	Aromatic Compound Degradation	Degradation/Utilization/Assimilation	Adlercreutzia	0.707764	0.000231527
PWY-5417	catechol degradation III (ortho-cleavage pathway)	Aromatic Compound Degradation	Degradation/Utilization/Assimilation	Adlercreutzia	0.759204	8.3e-05
PWY-5431	aromatic compounds degradation via beta-ketoadipate	Aromatic Compound Degradation	Degradation/Utilization/Assimilation	Adlercreutzia	0.759204	8.3e-05
PWY-5419	catechol degradation to 2-hydroxypentadienoate II	Aromatic Compound Degradation	Degradation/Utilization/Assimilation	Aerococcus	0.749523	3.54e-15
CATECHOL-ORTHO-CLEAVAGE-PWY	catechol degradation to beta-ketoadipate	Aromatic Compound Degradation	Degradation/Utilization/Assimilation	Burkholderia	0.921273	1.22e-25
PROTOCATECHUATE-ORTHO-CLEAVAGE-PWY	protocatechuate degradation II (ortho-cleavage pathway)	Aromatic Compound Degradation	Degradation/Utilization/Assimilation	Burkholderia	0.884216	4.89e-20
PWY-5417	catechol degradation III (ortho-cleavage pathway)	Aromatic Compound Degradation	Degradation/Utilization/Assimilation	Burkholderia	0.92789	7.9e-28
PWY-5431	aromatic compounds degradation via beta-ketoadipate	Aromatic Compound Degradation	Degradation/Utilization/Assimilation	Burkholderia	0.92789	7.9e-28
CATECHOL-ORTHO-CLEAVAGE-PWY	catechol degradation to beta-ketoadipate	Aromatic Compound Degradation	Degradation/Utilization/Assimilation	Gemella	0.825412	1.63e-07
PROTOCATECHUATE-ORTHO-CLEAVAGE-PWY	protocatechuate degradation II (ortho-cleavage pathway)	Aromatic Compound Degradation	Degradation/Utilization/Assimilation	Gemella	0.78479	1.01e-06
PWY-5417	catechol degradation III (ortho-cleavage pathway)	Aromatic Compound Degradation	Degradation/Utilization/Assimilation	Gemella	0.831594	1.53e-07
PWY-5431	aromatic compounds degradation via beta-ketoadipate	Aromatic Compound Degradation	Degradation/Utilization/Assimilation	Gemella	0.831594	1.53e-07
PWY0-1241	ADP-L-glycero-beta-D-manno-heptose biosynthesis	Carbohydrate Biosynthesis	Biosynthesis	Desulfovibrio	0.724901	0.00308843
PWY0-1241	ADP-L-glycero-beta-D-manno-heptose biosynthesis	Carbohydrate Biosynthesis	Biosynthesis	Gemella	0.700413	0.0116546
P124-PWY	Bifidobacterium shunt	Carbohydrate Degradation	Degradation/Utilization/Assimilation	Adlercreutzia	0.774009	1.35e-05
PWY-5941	glycogen degradation II	Carbohydrate Degradation	Degradation/Utilization/Assimilation	Adlercreutzia	0.819261	1.79e-05
P124-PWY	Bifidobacterium shunt	Carbohydrate Degradation	Degradation/Utilization/Assimilation	Burkholderia	0.726925	7.8e-05
PWY-5941	glycogen degradation II	Carbohydrate Degradation	Degradation/Utilization/Assimilation	Burkholderia	0.998958	8.7e-106
P124-PWY	Bifidobacterium shunt	Carbohydrate Degradation	Degradation/Utilization/Assimilation	Gemella	0.76001	3.63e-05
PWY-5941	glycogen degradation II	Carbohydrate Degradation	Degradation/Utilization/Assimilation	Gemella	0.92006	2.23e-07
PWY-6737	starch degradation V	Carbohydrate Degradation	Degradation/Utilization/Assimilation	Kineothrix	0.691121	9.9e-07
P441-PWY	superpathway of N-acetylneuraminate degradation	Carboxylate Degradation	Degradation/Utilization/Assimilation	Desulfovibrio	0.681366	0.00206564
PWY-6471	peptidoglycan biosynthesis IV (Enterococcus faecium)	Cell Structure Biosynthesis	Biosynthesis	Adlercreutzia	0.706451	0.000101028
BIOTIN-BIOSYNTHESIS-PWY	biotin biosynthesis I	Cofactor, Carrier, and Vitamin Biosynthesis	Biosynthesis	Burkholderia	-0.747941	0.00271435
PWY-5005	biotin biosynthesis II	Cofactor, Carrier, and Vitamin Biosynthesis	Biosynthesis	Desulfovibrio	0.852224	1.05e-19
PWY-6891	thiazole component of thiamine diphosphate biosynthesis II	Cofactor, Carrier, and Vitamin Biosynthesis	Biosynthesis	Desulfovibrio	0.701726	0.000487153
PWY-6895	superpathway of thiamine diphosphate biosynthesis II	Cofactor, Carrier, and Vitamin Biosynthesis	Biosynthesis	Desulfovibrio	0.683243	4.01e-05
BIOTIN-BIOSYNTHESIS-PWY	biotin biosynthesis I	Cofactor, Carrier, and Vitamin Biosynthesis	Biosynthesis	Gemella	-0.743455	0.00501057
FASYN-INITIAL-PWY	superpathway of fatty acid biosynthesis initiation (E. coli)	Fatty Acid and Lipid Biosynthesis	Biosynthesis	Burkholderia	-0.746723	0.0108181
PWY0-862	(5Z)-dodecenoate biosynthesis I	Fatty Acid and Lipid Biosynthesis	Biosynthesis	Burkholderia	-0.746723	0.010412
PWY-5971	palmitate biosynthesis II (bacteria and plant cytoplasm)	Fatty Acid and Lipid Biosynthesis	Biosynthesis	Burkholderia	-0.746723	0.00692922
PWY-5989	stearate biosynthesis II (bacteria and plants)	Fatty Acid and Lipid Biosynthesis	Biosynthesis	Burkholderia	-0.746723	0.0102242
PWY-6282	palmitoleate biosynthesis I (from (5Z)-dodec-5-enoate)	Fatty Acid and Lipid Biosynthesis	Biosynthesis	Burkholderia	-0.746723	0.0105783
PWY-7664	oleate biosynthesis IV (anaerobic)	Fatty Acid and Lipid Biosynthesis	Biosynthesis	Burkholderia	-0.746723	0.010016
PWYG-321	mycolate biosynthesis	Fatty Acid and Lipid Biosynthesis	Biosynthesis	Burkholderia	-0.747941	0.00991423
FASYN-INITIAL-PWY	superpathway of fatty acid biosynthesis initiation (E. coli)	Fatty Acid and Lipid Biosynthesis	Biosynthesis	Gemella	-0.740145	0.015357
PWY0-862	(5Z)-dodecenoate biosynthesis I	Fatty Acid and Lipid Biosynthesis	Biosynthesis	Gemella	-0.740145	0.0148952
PWY-5971	palmitate biosynthesis II (bacteria and plant cytoplasm)	Fatty Acid and Lipid Biosynthesis	Biosynthesis	Gemella	-0.740145	0.0107524
PWY-5989	stearate biosynthesis II (bacteria and plants)	Fatty Acid and Lipid Biosynthesis	Biosynthesis	Gemella	-0.740145	0.0146438
PWY-6282	palmitoleate biosynthesis I (from (5Z)-dodec-5-enoate)	Fatty Acid and Lipid Biosynthesis	Biosynthesis	Gemella	-0.740145	0.0150925
PWY-7664	oleate biosynthesis IV (anaerobic)	Fatty Acid and Lipid Biosynthesis	Biosynthesis	Gemella	-0.740145	0.01443
PWYG-321	mycolate biosynthesis	Fatty Acid and Lipid Biosynthesis	Biosynthesis	Gemella	-0.743455	0.0143219
P122-PWY	heterolactic fermentation	Fermentation	Generation of Precursor Metabolites and Energy	Adlercreutzia	0.753742	6.33e-06
P122-PWY	heterolactic fermentation	Fermentation	Generation of Precursor Metabolites and Energy	Burkholderia	0.710783	5.86e-05
P122-PWY	heterolactic fermentation	Fermentation	Generation of Precursor Metabolites and Energy	Gemella	0.724894	4.66e-05
DENITRIFICATION-PWY	nitrate reduction I (denitrification)	Inorganic Nutrient Metabolism	Degradation/Utilization/Assimilation	Adlercreutzia	0.721442	5.08e-05
DENITRIFICATION-PWY	nitrate reduction I (denitrification)	Inorganic Nutrient Metabolism	Degradation/Utilization/Assimilation	Burkholderia	0.916417	8.19e-30
PWY-1541	superpathway of taurine degradation	Inorganic Nutrient Metabolism	Degradation/Utilization/Assimilation	Burkholderia	0.705853	1.73e-08
PWY-5304	superpathway of sulfur oxidation (Acidianus ambivalens)	Inorganic Nutrient Metabolism	Degradation/Utilization/Assimilation	Desulfovibrio	0.817789	8.18e-08
DENITRIFICATION-PWY	nitrate reduction I (denitrification)	Inorganic Nutrient Metabolism	Degradation/Utilization/Assimilation	Gemella	0.814403	2.87e-07
PWY490-3	nitrate reduction VI (assimilatory)	Inorganic Nutrient Metabolism	Degradation/Utilization/Assimilation	Kineothrix	0.686899	7.98e-05
PWY0-166	superpathway of pyrimidine deoxyribonucleotides de novo biosynthesis (E. coli)	Nucleoside and Nucleotide Biosynthesis	Biosynthesis	Adlercreutzia	0.691438	0.00504875
PWY-7187	pyrimidine deoxyribonucleotides de novo biosynthesis II	Nucleoside and Nucleotide Biosynthesis	Biosynthesis	Adlercreutzia	0.688905	0.00584225
PWY0-166	superpathway of pyrimidine deoxyribonucleotides de novo biosynthesis (E. coli)	Nucleoside and Nucleotide Biosynthesis	Biosynthesis	Burkholderia	0.701239	0.000253969
PWY-7187	pyrimidine deoxyribonucleotides de novo biosynthesis II	Nucleoside and Nucleotide Biosynthesis	Biosynthesis	Burkholderia	0.695351	0.000269583
PWY-6545	pyrimidine deoxyribonucleotides de novo biosynthesis III	Nucleoside and Nucleotide Biosynthesis	Biosynthesis	Desulfovibrio	0.703134	0.00123691
PWY0-166	superpathway of pyrimidine deoxyribonucleotides de novo biosynthesis (E. coli)	Nucleoside and Nucleotide Biosynthesis	Biosynthesis	Gemella	0.736533	1.55e-05
PWY-7187	pyrimidine deoxyribonucleotides de novo biosynthesis II	Nucleoside and Nucleotide Biosynthesis	Biosynthesis	Gemella	0.727804	2.84e-05
PWY-6519	8-amino-7-oxononanoate biosynthesis I	Other Biosynthesis	Biosynthesis	Burkholderia	-0.747941	0.00408422
PWY-6519	8-amino-7-oxononanoate biosynthesis I	Other Biosynthesis	Biosynthesis	Gemella	-0.743455	0.00690834
PWY-5910	superpathway of geranylgeranyldiphosphate biosynthesis I (via mevalonate)	Polyprenyl Biosynthesis	Biosynthesis	Adlercreutzia	0.692845	1.82e-05
PWY-922	mevalonate pathway I (eukaryotes and bacteria)	Secondary Metabolite Biosynthesis	Biosynthesis	Adlercreutzia	0.687872	9.71e-06
PWY-6876	isopropanol biosynthesis (engineered)		Generation of Precursor Metabolites and Energy	Burkholderia	0.902896	0.000282181
GLYCOLYSIS-E-D	superpathway of glycolysis and the Entner-Doudoroff pathway		Generation of Precursor Metabolites and Energy	Desulfovibrio	0.846594	6.26e-06
PWY-6876	isopropanol biosynthesis (engineered)		Generation of Precursor Metabolites and Energy	Gemella	0.814736	0.0221652
PWY0-781	aspartate superpathway		Superpathways	Desulfovibrio	0.680334	2.33e-05
